# Supplementary material for: Bayesian Linkage Analysis of Categorical Traits for Arbitrary Pedigree Designs
Source: PubMed Central journal article supplement (PMC2928726; doi:10.1371/journal.pone.0012307), 2010-08-26
Supplement: pone.0012307.s008.pdf [file pone.0012307.s008.pdf]

| Model | Phenotype | qq   | Qq  | QQ  |
|-------|-----------|------|-----|-----|
| B     | $d = 1$   | .99  | .3  | .2  |
|       | $d = 2$   | .005 | .4  | .3  |
|       | $d = 3$   | .005 | .3  | .5  |
| C     | $d = 1$   | .9   | .2  | .05 |
|       | $d = 2$   | .05  | .6  | .15 |
|       | $d = 3$   | .05  | .2  | .8  |
| D     | $d = 1$   | .9   | .05 | .05 |
|       | $d = 2$   | .05  | .9  | .05 |
|       | $d = 3$   | .05  | .05 | .9  |
